# Supplementary material
Source: HighWire-hosted journal article supplement (http://www.cmaj.ca/highwire/filestream/60013/field_highwire_adjunct_files/0/160515-res-1-at.pdf)
Supplement: 160515-res-1-at.pdf [file 160515-res-1-at.pdf]

## **Appendix 1 (as supplied by the authors): Participating institutions**

Burnaby Hospital, Burnaby, British Columbia  
Chinook Regional Hospital, Lethbridge, Alberta  
Concordia Hospital, Winnipeg, Manitoba  
Foothills Medical Centre, Calgary, Alberta  
Hamilton Health Sciences Centre, Hamilton, Ontario  
Ottawa Hospital Civic Campus, Ottawa, Ontario  
Ottawa Hospital General Campus, Ottawa, Ontario  
Peter Lougheed Centre, Calgary, Alberta  
Rockyview General Hospital, Calgary, Alberta  
Royal Columbian Hospital, New Westminster, British Columbia  
St Paul's Hospital, Vancouver, British Columbia  
Vancouver General Hospital, Vancouver, British Columbia
